# Supplementary material for: Epigenetic Modifications Related to Potato Skin Russeting
Source: MDPI journal article supplement (doi:10.3390/plants12102057), 2023-05-22
Supplement: s1 [file s1]

**Table S1.** Epigenetic markers in the transcriptome of potato phellogen †

| Gene code                                                         | Gene name                                                | Comment                           | FPKM    | Sotub ID           | TAIR ID     |
|-------------------------------------------------------------------|----------------------------------------------------------|-----------------------------------|---------|--------------------|-------------|
| <b>Chromatin assembly/disassembly/remodeling</b>                  |                                                          |                                   |         |                    |             |
| <i>SWC4*</i>                                                      | SWR1-COMPLEX 4                                           |                                   |         | Sotub01g023480.1.1 | At2g47210   |
| <i>HMGB3</i>                                                      | HIGH MIBILITY GROUP B3                                   |                                   | 2117.77 | Sotub02g026070.1.1 | At1g20696.3 |
| <i>HMGB3</i>                                                      | HIGH MIBILITY GROUP B3                                   |                                   | 1774.75 | Sotub03g008810.1.1 | At1g20696.2 |
| <i>CHR4</i>                                                       | CHROMATIN REMODELING 19                                  |                                   | 818.05  | Sotub02g014700.1.1 | At5g44800.1 |
| <i>CHR19</i>                                                      | CHROMATIN REMODELING 11                                  |                                   | 284.21  | Sotub02g005500.1.1 | At2g02090.1 |
| <i>CHR11</i>                                                      | CHROMATIN REMODELING 11                                  |                                   | 6.64    | Sotub01g021440.1.1 | At3g06400.2 |
| <i>EEN</i>                                                        | CHROMATIN REMODELING COMPLEX                             |                                   | 2.57    | Sotub06g006620.1.1 | At4g38495.1 |
| <i>CHC1</i>                                                       | CHROMATIN REMODELING COMPLEX ASSOCIATED WITH SWI/SNF     |                                   | 99.45   | Sotub02g014170.1.1 | At5g14170.1 |
| <i>CHC1</i>                                                       | CHROMATIN REMODELING COMPLEX ASSOCIATED WITH SWI/SNF     |                                   | 1.37    | Sotub03g023850.1.1 | At5g14170.1 |
| <b>DNA methylation pathways</b>                                   |                                                          |                                   |         |                    |             |
| <i>DRM2*</i>                                                      | DOMAINS REARRANGED METHYLTRANSFERASE                     |                                   | 35.17   | Sotub02g010360.1.1 | At5g14620   |
| <i>AGO4</i>                                                       | ARGONAUTE 4                                              |                                   | 408.96  | Sotub01g009760.1.1 | At2g27040.2 |
| <i>DDM1</i>                                                       | NUCLEOSOME REMODELER                                     |                                   | 0.62    | Sotub02g010390.1.1 | At5g66750.1 |
| <i>DRD1</i>                                                       | RNA-DIRECTED DNA METHYLATION 1                           |                                   | 0.24    | Sotub01g047420.1.1 | At2g16390.1 |
| <i>RDR2</i>                                                       | RNA-DEPENDENT RNA POL 2                                  |                                   | 466.40  | Sotub03g027500.1.1 | At4g11130.1 |
| <i>ELF6</i>                                                       | EARLY FLOWERING 6                                        |                                   | 763.84  | Sotub04g018130.1.1 | At5g04240.1 |
| <b>DNA demethylation</b>                                          |                                                          |                                   |         |                    |             |
| <i>DML1, ROS1</i>                                                 | DEMETER LIKE1                                            |                                   | 0.48    | Sotub03g034510.1.1 | At2g36490.1 |
| <b>Histone (de)methylation</b>                                    |                                                          |                                   |         |                    |             |
| <i>ATX4*</i>                                                      | ARABIDOPSIS TRITHORAX                                    | H3K4me3                           | 3.53    | Sotub01g033330.1.1 | At4g27910   |
| <i>ATXR4*</i>                                                     | ATX-Related                                              | H3K4me3                           | 0.68    | Sotub03g011170.1.1 | At5g06620   |
| <i>SUVH4, KYP*</i>                                                | SU(VAR)3-9 HOMOLOG, KRYPTONITE                           | H3K9me1                           | 169.83  | Sotub02g037730.1.1 | At5g13960   |
| <i>SUVH6*</i>                                                     |                                                          |                                   | 1.12    | Sotub03g016470.1.1 | At2g22740   |
| <i>AL7</i>                                                        | ALFIN-LIKE 7 di- or trimethylated histone H3 (H3K4me3/2) | H3K4me3/2                         | 1265.27 | Sotub01g039670.1.1 | At1g14510.1 |
| <i>IBM1</i>                                                       | INCREASE IN BONSAI METHYLATION 1                         | H3mK9 demethylation               | 228.24  | Sotub04g016780.1.1 | At3g07610.1 |
| <i>JMJ20</i>                                                      | JUMONJI DOMAIN-CONTAINING PROTEIN 20                     | H4-R3 demethylation               | 18.47   | Sotub11g022090.1.1 | At5g63080.1 |
| <i>JMJ16</i>                                                      | JUMONJI DOMAIN-CONTAINING PROTEIN 16                     | H3K4 and H3K9 demethylation       | 8.29    | Sotub04g009950.1.1 | At1g08620.2 |
| <i>JMJ26</i>                                                      | JUMONJI DOMAIN-CONTAINING PROTEIN 26                     | H3K9 demethylation                | 2.61    | Sotub02g024130.1.1 | At1g11950.1 |
| <i>JMJ24</i>                                                      | JUMONJI DOMAIN-CONTAINING PROTEIN 24                     | H3K9 demethylation                | 1.65    | Sotub02g021650.1.1 | At1g09060.3 |
| <i>JMJD5</i>                                                      | JUMONJI DOMAIN-CONTAINING PROTEIN D5                     | Histone demethylase               | 0.07    | Sotub01g007240.1.1 | At3g20810.1 |
| <b>Histone deacetylase</b>                                        |                                                          |                                   |         |                    |             |
| <i>HDA3*</i>                                                      | HISTONE DEACETYLASE 3                                    |                                   | 8.25    | Sotub11g024650.1.1 | At3g44750   |
| <i>HDA5</i>                                                       | HISTONE DEACETYLASE 5                                    |                                   | 50.12   | Sotub03g028680.1.1 | At5g61060.1 |
| <i>HDA15</i>                                                      | HISTONE DEACETYLASE 15                                   |                                   | 1.41    | Sotub03g033280.1.1 | At3g18520.1 |
| <i>SNL2</i>                                                       | SIN3-LIKE 2                                              |                                   | 4.52    | Sotub02g035490.1.1 | At5g15020.2 |
| <b>Histone acetyltransferase</b>                                  |                                                          |                                   |         |                    |             |
| <i>HAC1</i>                                                       | HISTONE ACETYLASE 1                                      |                                   | 1021.46 | Sotub01g008490.1.1 | At1g79000.2 |
| <b>Known epigenetically regulated genes related to corky skin</b> |                                                          |                                   |         |                    |             |
| <i>H1.3</i>                                                       | HISTONE1.3                                               |                                   | 26.96   | Sotub02g027480     | At2g18050   |
| <i>MYB1</i>                                                       | MYB TRANSCRIPTION FACTOR                                 | Repression of lignin biosynthesis | 6.84    | Sotub01g048880     | At4g38620   |

† (Vulavala et al. 2019)

\* Putative regulators of *Q. suber* cork quality (Inácio et al. 2018)
